# Supplementary material for: Accurate and efficient machine learning models for predicting hydrogen evolution reaction catalysts based on structural and electronic feature engineering in alloys
Source: Royal Society of Chemistry journal article supplement (doi:10.1039/d3nr01442h), 2023-01-01
Supplement: d3nr01442h1.pdf [file d3nr01442h1.pdf]

## Supporting Information

### Accurate and Efficient Machine Learning Models for Predicting Hydrogen Evolution Reaction Catalysts Based on Structural and Electronic Feature Engineering in Alloys

Jingzi Zhang<sup>a,b,1</sup>, Yuelin Wang<sup>a,b,1</sup>, Xuyan Zhou<sup>a,b</sup>, Chengquan Zhong<sup>a,b</sup>, Ke Zhang<sup>a,b</sup>, Jiakai Liu, Kailong Hu<sup>a,b,c\*</sup>, and Xi Lin<sup>a,b,c\*</sup>

<sup>a</sup> *School of Materials Science and Engineering, Harbin Institute of Technology, Shenzhen 518055, Guangdong, China*

<sup>b</sup> *Blockchain Development and Research Institute, Harbin Institute of Technology, Shenzhen 518055, Guangdong, China*

<sup>c</sup> *State Key Laboratory of Advanced Welding and Joining, Harbin Institute of Technology, Harbin 150001, Heilongjiang, China*

\*Corresponding authors.

*E-mail addresses:* [linxi@hit.edu.cn](mailto:linxi@hit.edu.cn) (X. Lin);

[hukailong@hit.edu.cn](mailto:hukailong@hit.edu.cn) (K. Hu);

<sup>1</sup>These authors contributed equally to this work.

## **Method**

### **Support Vector Regression**

The SVR model represents instances as points in space, with the examples of different categories separated by a large gap. The SVR training algorithm creates a model that assigns new instances to one of two categories, making it a non-probabilistic binary linear classifier, based on a series of training examples that are individually labeled as belonging to one of two categories. New instances are then mapped into the same area and assigned to one of the categories based on which side of the gap they fall on. SVR can perform both linear and non-linear regression by utilizing the kernel trick, which involves implicitly transforming inputs into high-dimensional feature spaces.[1]

### **Gradient boosting decision tree**

GBDT model is a powerful tool for optimizing arbitrary differentiable loss functions. It works by constructing an additive model in a forward stage-wise fashion, where in each stage a regression tree is fit on the negative gradient of the given loss function. The boosting tree model was optimized using an additive model and a forward stagewise algorithm. During training, the negative gradient of the loss function was used to fit the approximate value of the loss in each iteration, resulting in a continuous reduction of the error term generated in the training process [2,3].

### **K-nearest neighbor**

KNN model has been demonstrated to be effective in cases where the data labels are continuous rather than discrete variables. This method utilizes an unsupervised learner to identify the nearest neighbors of a query point, and then assigns a label to the query point based on the mean of the labels of its nearest neighbors.[4]

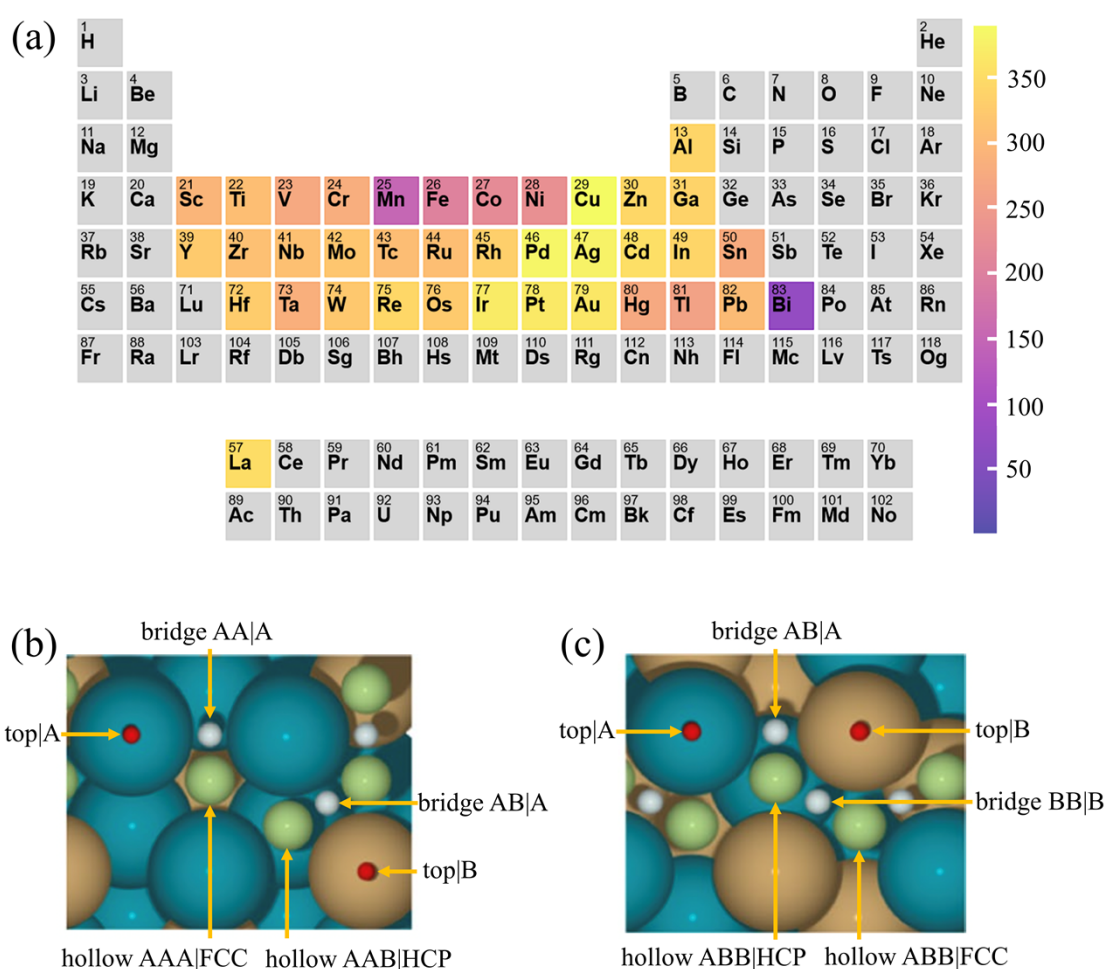

**Fig. S1.** (a) The periodic table outlining H adsorbate elements and the 37 metals included in the dataset. Structure models and enumerated adsorption sites: (b)  $A_3B$  alloy, (c) AB alloy. The A and B atoms are represented dark green and brown sphere. The top, bridge, and hollow sites are shown in red, white, and green, respectively.

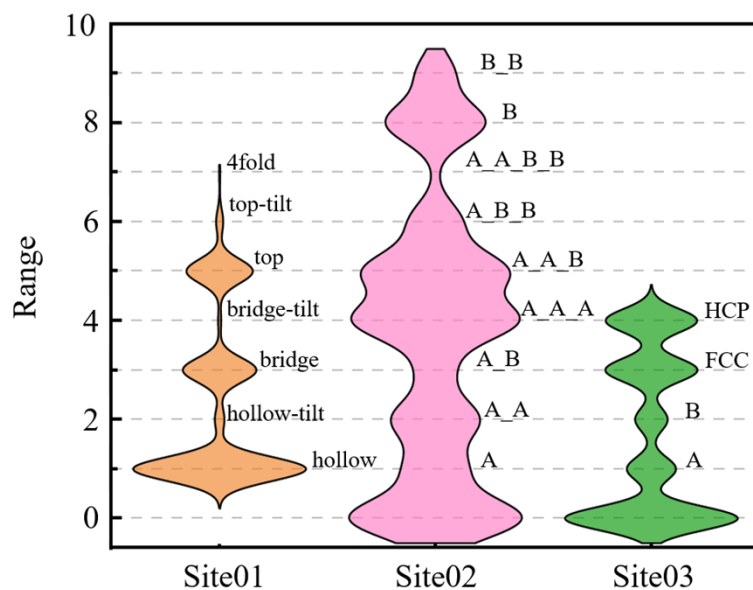

**Fig. S2.** The violins distribution represents three adsorption site features.

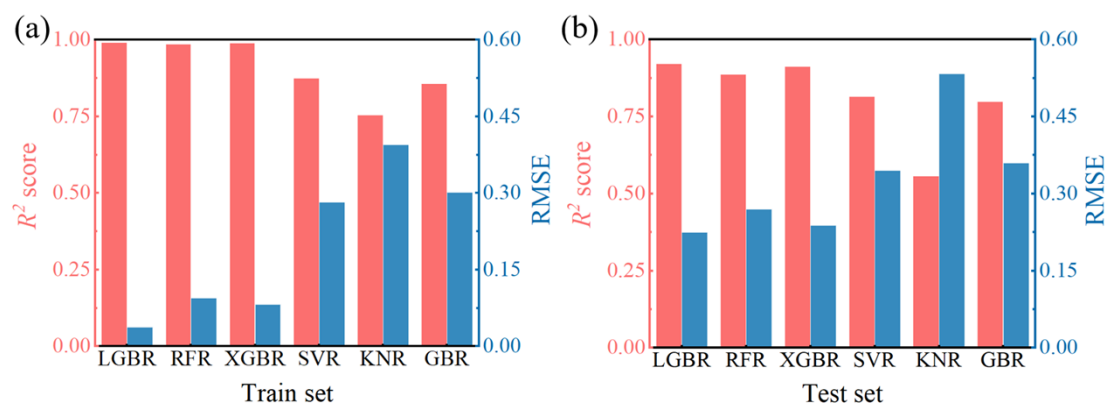

**Fig. S3.** Comparison of the  $R^2$  score and the RMSE for six ML models on (a) the train set and (b) the test set.

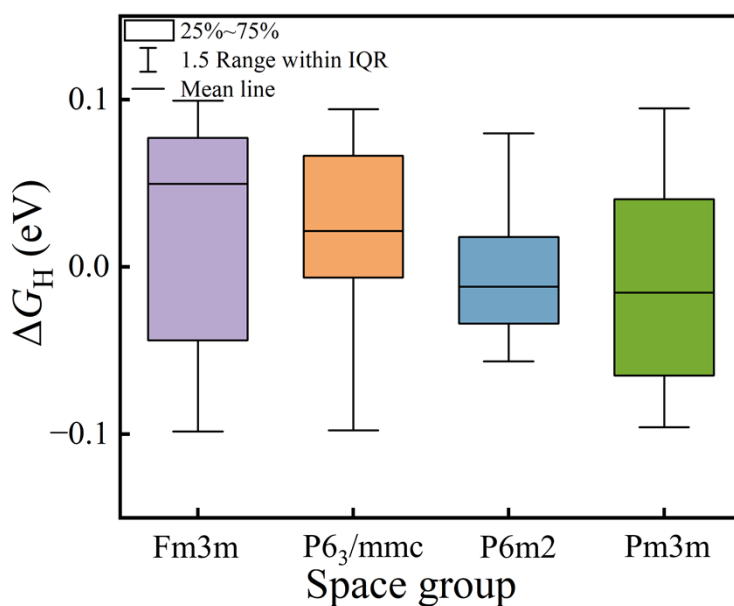

**Fig. S4.** Box plots of  $\Delta G_{H^*}$  distributions for different ranges of the space group.

**Table S1** Detailed parameters of eleven ML models.

| ML model name | Parameters                                                                                    |
|---------------|-----------------------------------------------------------------------------------------------|
| SVR           | Degree: 3<br>C: 1e3<br>Gamma: scale                                                           |
| KNN           | N_neighbors: 10<br>Weights: uniform<br>Leaf_size: 45                                          |
| LGB           | N_estimators: 1000<br>Num_leaves: 15<br>Max_depth: -1<br>Subsample: 0.6<br>Random_state: 2022 |
| RF            | N_estimators: 500<br>Max_depth: 8<br>Random_state: 2022                                       |
| GBDT          | Max_depth: 7<br>Min_samples_leaf: 8<br>N_estimators: 600<br>Random_state: 2022                |
| XGB           | Colsample_bytree: 0.9<br>Max_depth: 5<br>N_estimators: 700<br>Objective: 'reg: squarederror'  |

**Table S2** Dataset for HER alloy materials.

| Number | Formula            | Site information | $\Delta G_{H^*}$ (eV) |
|--------|--------------------|------------------|-----------------------|
| 1      | Pt <sub>3</sub> Ti | bridge AA B      | -0.052                |
| 12     | Sc <sub>3</sub> Cu | top B            | 0.095                 |
| ...    | ...                | ...              | ...                   |
| 8856   | MnRu               | hollow AAB FCC   | 0.026                 |

**Table S3** Calculation methods of element features in compounds. The “i” represents the element number of alloys. The “t” represents the property of element. The “p” represents the weighted score. In the calculation of the weight entropy of mixing  $\omega = t_i/(t_1 + \dots + t_i)$ .

| Features description        | Computational formula                                                                                                                                                                                                                                                            |
|-----------------------------|----------------------------------------------------------------------------------------------------------------------------------------------------------------------------------------------------------------------------------------------------------------------------------|
| The average                 | $= \mu = (t_1 + \dots + t_i)/i$                                                                                                                                                                                                                                                  |
| Weighted mean               | $= v = (p_1 \times t_1) + \dots + (p_i \times t_i)$                                                                                                                                                                                                                              |
| Geometric mean              | $= (t_1 \times \dots \times t_i)^{1/i}$                                                                                                                                                                                                                                          |
| Weighted geometric mean     | $= (t_1)^{p_1} \times \dots \times (t_i)^{p_i}$                                                                                                                                                                                                                                  |
| The entropy of mixing       | $= -\omega_1 \ln(\omega_1) - \dots - \omega_i \ln(\omega_i)$                                                                                                                                                                                                                     |
| Weighted entropy of mixing  | $= -\frac{p_1 \omega_1}{p_1 \omega_1 + \dots + p_i \omega_i} \ln\left(\frac{p_1 \omega_1}{p_1 \omega_1 + \dots + p_i \omega_i}\right) \dots - \frac{p_i \omega_i}{p_1 \omega_1 + \dots + p_i \omega_i} \ln\left(\frac{p_i \omega_i}{p_1 \omega_1 + \dots + p_i \omega_i}\right)$ |
| Extreme value range         | $= t_1 - t_2 (t_1 > t_2)$                                                                                                                                                                                                                                                        |
| Weighted range              | $= p_1 t_1 - p_2 t_2$                                                                                                                                                                                                                                                            |
| The standard deviation      | $= [(1/2)((t_1 - \mu)^2 + (t_2 - \mu)^2)]^{1/2}$                                                                                                                                                                                                                                 |
| Weighted standard deviation | $= [p_1(t_1 - v)^2 + p_2(t_2 - v)^2]^{1/2}$                                                                                                                                                                                                                                      |
| The maximum                 | $= \text{Maximum}(t_1, t_2)$                                                                                                                                                                                                                                                     |
| The minimum value           | $= \text{Minimum}(t_1, t_2)$                                                                                                                                                                                                                                                     |
| The mode                    | $= \text{Mode}(\text{count}(t_1, t_2))$                                                                                                                                                                                                                                          |
| Element species number      | $= \text{Unique}([t_1, t_2])$                                                                                                                                                                                                                                                    |

**Table S4** The explication and LabelEncoder method for adsorption site features in the

dataset.

| Num | Site name                  | Site feature description                                                                                 | LabelEncoder S <sub>1</sub> | LabelEncoder S <sub>2</sub> | LabelEncoder S <sub>3</sub> |
|-----|----------------------------|----------------------------------------------------------------------------------------------------------|-----------------------------|-----------------------------|-----------------------------|
| 1   | top A                      | The top site of atom A                                                                                   | 3                           | 1                           | 0                           |
| 2   | top B                      | The top site of atom B                                                                                   | 3                           | 8                           | 0                           |
| 3   | bridge<br>AA A             | The bridge site between atom A and atom A, and near the atom A                                           | 2                           | 2                           | 1                           |
| 4   | bridge<br>AB B             | The bridge site between atom A and atom A, and near the atom B                                           | 2                           | 3                           | 2                           |
| 5   | bridge<br>AB A             | The bridge site between atom A and atom B, and near the atom A                                           | 2                           | 3                           | 1                           |
| 6   | bridge<br>BB B             | The bridge site between atom B and atom B, and near the atom B                                           | 2                           | 9                           | 2                           |
| 7   | hollow<br>w<br>AAB <br>FCC | The hollow site between two atom A and one atom B, and there are no atoms directly below the hollow site | 1                           | 5                           | 3                           |
| 8   | hollow<br>w<br>AAB <br>HCP | The hollow site between two atom A and one atom B, and there are atoms directly below the hollow site    | 1                           | 5                           | 4                           |
| 9   | hollow<br>w<br>AAA <br>FCC | The hollow site between three atoms A, and there is atom directly below it                               | 1                           | 4                           | 3                           |
| 10  | hollow<br>w<br>AAA <br>HCP | The hollow site between three atoms A, and there is atom directly below it                               | 1                           | 4                           | 4                           |
| 11  | 4fold                      | The hollow between four atoms                                                                            | 4                           | 0                           | 0                           |

**Table S5** The S<sub>1</sub> feature coded by LabelEncoder method.

| S <sub>1</sub> site types | LabelEncoder number |
|---------------------------|---------------------|
| hollow                    | 1                   |
| bridge                    | 2                   |
| top                       | 3                   |
| 4fold                     | 4                   |
| hollow-tilt               | 5                   |
| top-tilt                  | 6                   |
| bridge-tilt               | 7                   |

**Table S6** The S<sub>2</sub> feature coded by LabelEncoder method.

| <b>S<sub>2</sub> site types</b> | <b>LabelEncoder number</b> |
|---------------------------------|----------------------------|
| A                               | 1                          |
| AA                              | 2                          |
| AB                              | 3                          |
| AAA                             | 4                          |
| AAB                             | 5                          |
| ABB                             | 6                          |
| AABB                            | 7                          |
| B                               | 8                          |
| BB                              | 9                          |

**Table S7** The S<sub>3</sub> feature coded by LabelEncoder method.

| <b>S<sub>3</sub> site types</b> | <b>LabelEncoder number</b> |
|---------------------------------|----------------------------|
| A                               | 1                          |
| B                               | 2                          |
| FCC                             | 3                          |
| HCP                             | 4                          |

**Table S8** The explication of 20 features in SHAP value plot.

| Num | Feature name   | Feature description                                                                               |
|-----|----------------|---------------------------------------------------------------------------------------------------|
| 1   | M <sub>c</sub> | Mean column: mean of group number of elements in the composition                                  |
| 2   | S <sub>2</sub> | Site02: the position of atoms around the adsorption site                                          |
| 3   | M <sub>p</sub> | Mean melting point: mean of melting point of elements in the composition                          |
| 4   | S <sub>1</sub> | Site01: the position information of the adsorption site                                           |
| 5   | M <sub>d</sub> | Mean NdUnfilled: mean of number of unfilled <i>d</i> -orbitals among elements in the composition  |
| 6   | M <sub>u</sub> | Mean Nunfilled: mean of number of unfilled valence orbitals among elements in the composition     |
| 7   | S <sub>3</sub> | Site03: the atoms position of adsorbed substance H around the adsorption site                     |
| 8   | D <sub>f</sub> | Std_dev heat of formation: standard deviation of heat formation among elements in the composition |
| 9   | M <sub>r</sub> | Mean covalent radius: mean of covalent radius among elements in the composition                   |
| 10  | M <sub>v</sub> | Mean ndvalence: mean of number of valence <i>d</i> -orbitals among elements in the composition    |
| 11  | M <sub>e</sub> | Mean electronegativity: mean of electronegativity among elements in the composition               |
| 12  | E <sub>f</sub> | Entropy heat of formation: weighted entropy of heat formation among elements in the composition   |



|    |       |                                                                                                     |
|----|-------|-----------------------------------------------------------------------------------------------------|
| 13 | $D_c$ | Std_dev lattice constant: standard deviation of lattice constant among elements in the composition  |
| 14 | $E_r$ | Entropy metallic radius: weighted entropy of metallic radius among elements in the composition      |
| 15 | $M_t$ | Mean thermal conductivity: mean of thermal conductivity among elements in the composition           |
| 16 | $M_n$ | Mean Mendeleev number: mean of Mendeleev number among elements in the composition                   |
| 17 | $E_a$ | Entropy atomic volume: weighted entropy of atomic volume among elements in the composition          |
| 18 | $E_h$ | Entropy fusion heat: weighted entropy of fusion heat among elements in the composition              |
| 19 | $M_a$ | Mean atomic weight: mean of atomic weight among elements in the composition                         |
| 20 | $A_e$ | Avg_dev electronegativity: average deviation of electronegativity among elements in the composition |

**Table S9** Comparison of experimentally measured  $\eta^{HER}$  with the values predicted by LGB model with three HER alloy electrocatalysts in the dataset.

| Alloy | DFT $\eta^{HER}$ (V) | ML predicted $\eta^{HER}$ (V) | Experimentally measured $\eta^{HER}$ (V) |
|-------|----------------------|-------------------------------|------------------------------------------|
| CoNi  | 0.075                | 0.083                         | 0.098 [5]                                |
| PtRu  | 0.146                | 0.131                         | 0.113 [6]                                |
| RuCo  | 0.017                | 0.016                         | 0.010 [7]                                |
| FeNi  | 0.124                | 0.126                         | 0.126 [8]                                |

**Table S10** The  $\Delta G_{H^*}$  values of fourteen alloys from MP database using ML model prediction and the DFT calculation.

| Num | Mp-id    | Formula | ML- $\Delta G_{H^*}$ (eV) | DFT- $\Delta G_{H^*}$ (eV) | ML- $\eta_{HER}$ (V) | DFT- $\eta_{HER}$ (V) | Site   |
|-----|----------|---------|---------------------------|----------------------------|----------------------|-----------------------|--------|
| 1   | mp-437   | MgAu    | -0.095                    | 0.081                      | 0.095                | 0.081                 | bridge |
| 2   | mp-721   | TbCd    | -0.021                    | 0.013                      | 0.021                | 0.013                 | bridge |
| 3   | mp-1172  | MgRh    | -0.105                    | 0.020                      | 0.105                | 0.020                 | bridge |
| 4   | mp-1857  | YbCd    | -0.043                    | 0.016                      | 0.043                | 0.016                 | bridge |
| 5   | mp-2165  | SmZn    | -0.038                    | 0.020                      | 0.038                | 0.020                 | bridge |
| 6   | mp-2525  | PrAg    | -0.041                    | 0.050                      | 0.041                | 0.050                 | top    |
| 7   | mp-2724  | TbSb    | 0.042                     | 0.051                      | 0.042                | 0.051                 | bridge |
| 8   | mp-7576  | CrSi    | -0.037                    | 0.050                      | 0.037                | 0.050                 | bridge |
| 9   | mp-11256 | ScAu    | 0.038                     | 0.036                      | 0.038                | 0.036                 | top    |
| 10  | mp-12793 | NdAl    | -0.077                    | -0.024                     | 0.077                | 0.024                 | bridge |

|    |            |      |        |       |       |       |        |
|----|------------|------|--------|-------|-------|-------|--------|
| 11 | mp-20582   | LaIn | -0.047 | 0.019 | 0.047 | 0.019 | bridge |
| 12 | mp-574283  | GdTe | -0.040 | 0.097 | 0.040 | 0.097 | bridge |
| 13 | mp-998985  | TiAu | -0.048 | 0.012 | 0.048 | 0.012 | top    |
| 14 | mp-1079910 | SiTc | 0.033  | 0.047 | 0.033 | 0.047 | top    |

## References

- [1] H. Drucker, C.J. Burges, L. Kaufman, A. Smola, V. Vapnik, Support vector regression machines, *Adv. Neural. Inf. Process. Syst.* 9 (1996)
- [2] H. Rao, X. Shi, A.K. Rodrigue, J. Feng, Y. Xia, M. Elhoseny, X. Yuan, L. Gu, Feature selection based on artificial bee colony and gradient boosting decision tree, *Appl. Soft Comput.* 74 (2019) 634–642.
- [3] J. Feng, Y. Yu, Z.-H. Zhou, Multi-layered gradient boosting decision trees, *Adv. Neural. Inf. Process. Syst.* 31 (2018)
- [4] J.M. Keller, M.R. Gray, J.A. Givens, A fuzzy k-nearest neighbor algorithm, *IEEE Trans. Syst. Man Cybern.* (1985) 580–585.
- [5] Tan X, Geng S, Ji Y, et al. Closest packing polymorphism interfaced metastable transition metal for efficient hydrogen evolution. *Advanced Materials*, 2020, 32(40): 2002857.
- [6] Zhang D, Wang Z, Wu X, et al. Noble metal (Pt, Rh, Pd, Ir) doped Ru/CNT ultra - small alloy for acidic hydrogen evolution at high current density. *Small*, 2022, 18(3): 2104559.
- [7] Cai C, Liu K, Zhu Y, et al. Optimizing hydrogen binding on Ru sites with RuCo alloy nanosheets for efficient alkaline hydrogen evolution. *Angewandte Chemie International Edition*, 2022, 61(4): e202113664.
- [8] Ren J T, Chen L, Wang Y S, et al. FeNi nanoalloys encapsulated in N-doped CNTs tangled with N-doped carbon nanosheets as efficient multifunctional catalysts for overall water splitting and rechargeable Zn–Air batteries. *ACS Sustainable Chemistry & Engineering*, 2019, 8(1): 223-237.
